# Supplementary material for: Enteral siRNA delivery technique for therapeutic gene silencing in the liver via the lymphatic route
Source: PubMed Central journal article supplement (PMC4655470; doi:10.1038/srep17035), 2015-11-23
Supplement: srep17035-s1.pdf [file srep17035-s1.pdf]

## Supplementary Information

### Enteral siRNA delivery technique for therapeutic gene silencing in the liver via the lymphatic route

Masahiro Murakami<sup>1,2</sup>, Kazutaka Nishina<sup>2,3</sup>, Chie Watanabe<sup>1,2</sup>, Kie Yoshida-Tanaka<sup>2,3</sup>, Wenying Piao<sup>2,3</sup>, Hiroya Kuwahara<sup>2,3</sup>, Yuji Horikiri<sup>1</sup>, Kanjiro Miyata<sup>4</sup>, Nobuhiro Nishiyama<sup>4,5</sup>, Kazunori Kataoka<sup>4,6</sup>, Masayuki Yoshida<sup>7</sup>, Hidehiro Mizusawa<sup>3,8,9</sup> & Takanori Yokota<sup>2,3,8</sup>

<sup>1</sup> Laboratory of Pharmaceutics, Faculty of Pharmacy, Osaka Ohtani University, 3-11-1 Nisikiori-Kita, Tondabayashi-shi, Osaka 584-8540, Japan.

<sup>2</sup> Section of Molecular Technology, Core Research for Evolutional Science and Technology (CREST), Japan Science and Technology Agency (JST), 4-1-8 Honcho, Kawaguchi-shi, Saitama 332-0012, Japan.

<sup>3</sup> Department of Neurology and Neurological Science, Graduate School of Medical and Dental Sciences, Tokyo Medical and Dental University, 1-5-45 Yushima, Bunkyo-ku, Tokyo 113-8519, Japan.

<sup>4</sup> Division of Clinical Biotechnology, Center for Disease Biology and Integrative Medicine, Graduate School of Medicine, The University of Tokyo, 7-3-1 Hongo, Bunkyo-ku, Tokyo 113-8656, Japan.

<sup>5</sup> Polymer Chemistry Division, Chemical Resources Laboratory, Tokyo Institute of Technology, 4259 Nagatsuta, Midori-ku, Yokohama-shi, Kanagawa 226-8503, Japan.

<sup>6</sup> Department of Materials Engineering, Graduate School of Engineering, The University of Tokyo, Bunkyo-ku, Tokyo 113-8656, Japan.

<sup>7</sup> Department of Life Science and Medical Ethics, Graduate School of Medical and Dental Sciences, Tokyo Medical and Dental University, 1-5-45 Yushima, Bunkyo-ku, Tokyo 113-8519, Japan.

<sup>8</sup> Center for Brain Integration Research, Tokyo Medical and Dental University, 1-5-45 Yushima, Bunkyo-ku, Tokyo 113-8519, Japan.

<sup>9</sup> National Center Hospital, National Center of Neurology and Psychiatry, 4-1-1 Ogawahigashi-machi, Kodaira-shi, Tokyo 187-8551, Japan.

## SUPPLEMENTARY FIGURES

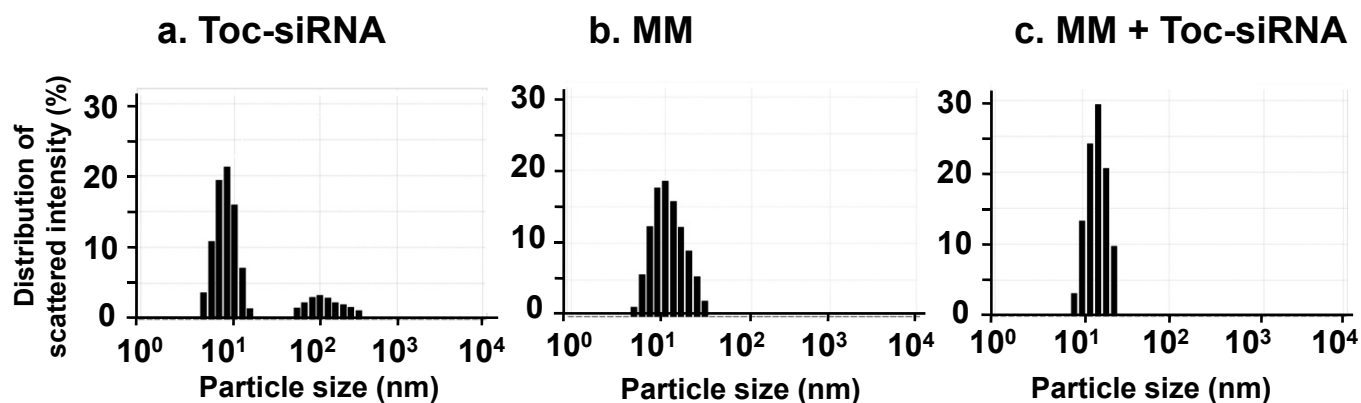

**Supplementary Figure S1.** Particle-size distribution was determined by dynamic light scattering (DLS) on (a) Toc-siRNA aqueous solution (pH 7.4 in PBS) and (b) linoleic acid-HCO60 mixed micelles (MM). To examine formation of complexes, Toc-siRNA was incubated in advance at 37 ° C for 30 min with MM (c). Each experiment was performed in triplicate and the representative data of distribution were shown.

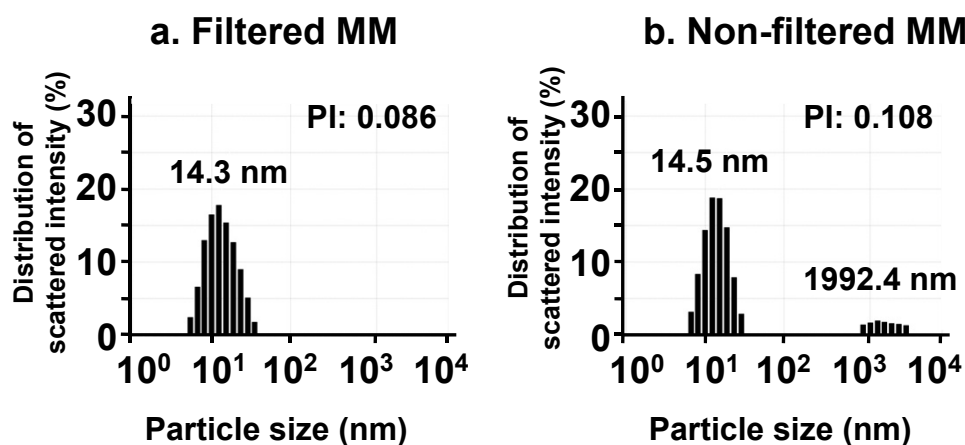

**Supplementary Figure S2.** Particle-size distribution of filtered mixed micelles (a) and unfiltered mixed micelles (b).

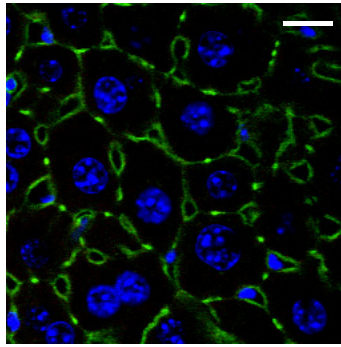

**Supplementary Figure S3.** Confocal images of mouse livers 4 h after administration of LNP to the jejunum. The dose of Toc-siRNA was 10 mg/kg of body weight. Red: Cy3-labeled Toc-siRNA; Green: FITC-Phalloidin; Blue: TO-PRO-3. Bar = 20  $\mu$ m.

### a. LNP with filtered MM

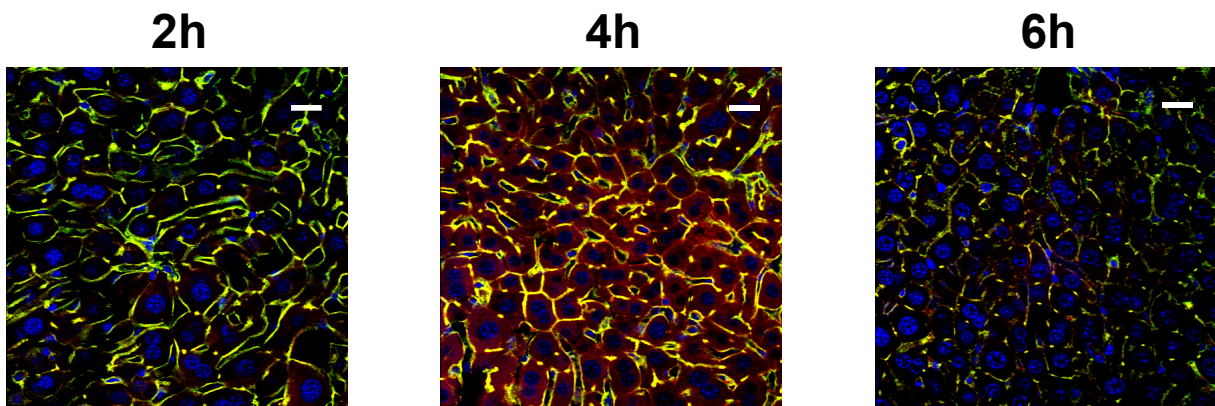

### b. LNP with non-filtered MM

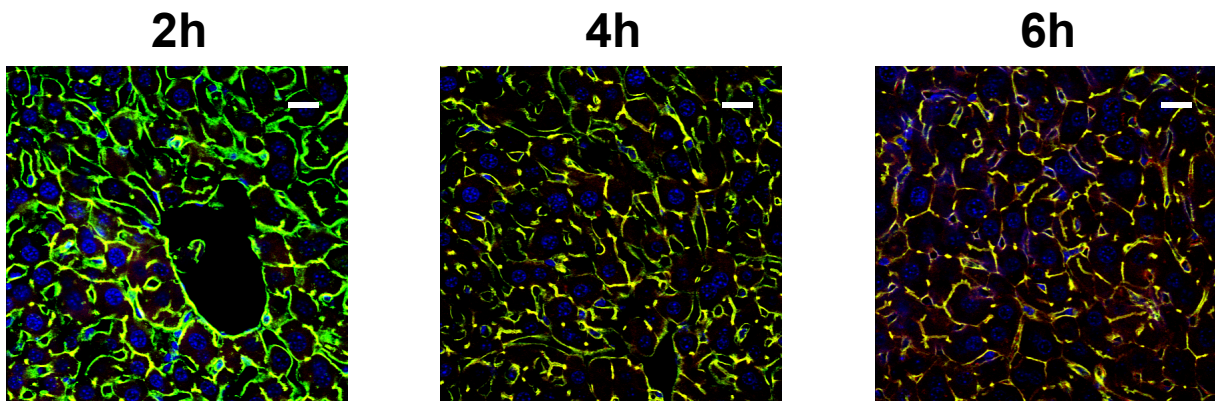

**Supplementary Figure S4.** Size distribution effect of emulsification on Toc-siRNA delivery. Confocal images of mouse liver at 2, 4, and 6 h after colorectal administration of LNP constructed with filtered mixed micelles (a) or with unfiltered mixed micelles (b). The uniformly-sized nano-emulsification was likely essential for effective siRNA delivery. Red, Cy3-labeled Toc-siRNA; Green: FITC-Phalloidin; Blue, TO-PRO-3. Bar = 20  $\mu$ m.

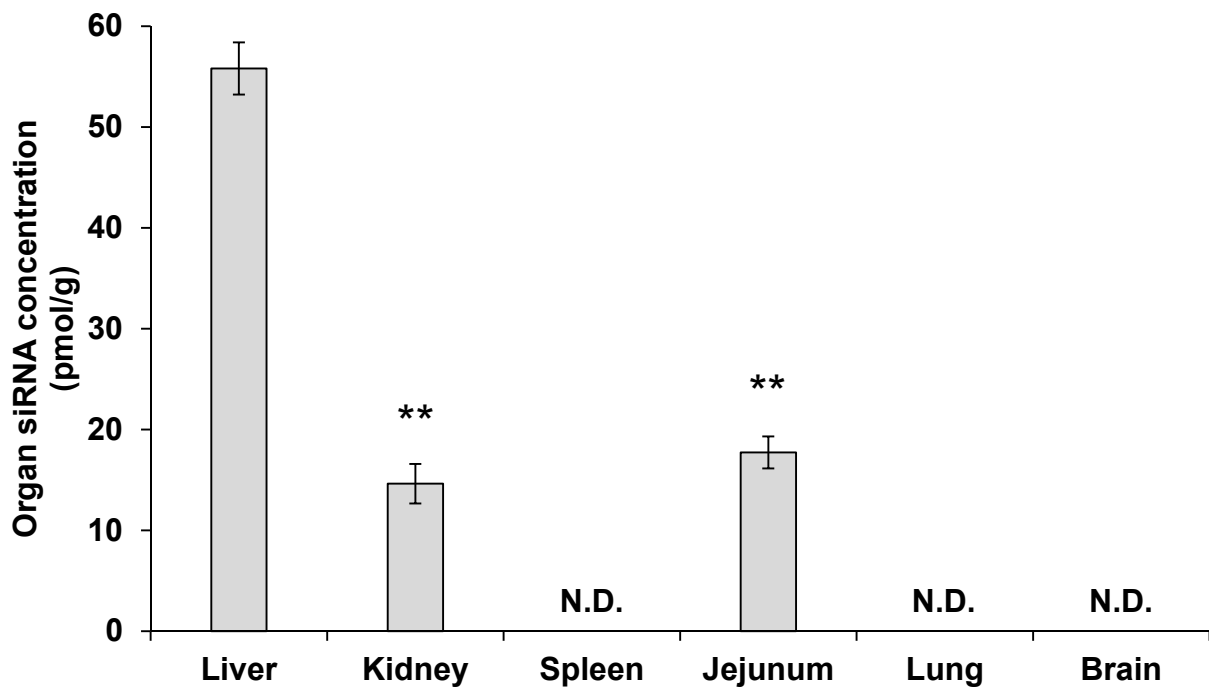

**Supplementary Figure S5.** Concentration of Toc-siRNA in each organ 4 h after administration of 10 mg/kg of Cy3-labeled Toc-siRNA.  $n = 3$ , mean values  $\pm$  s.e.m; \*\*  $P < 0.01$  versus Liver. N.D.: not detected.

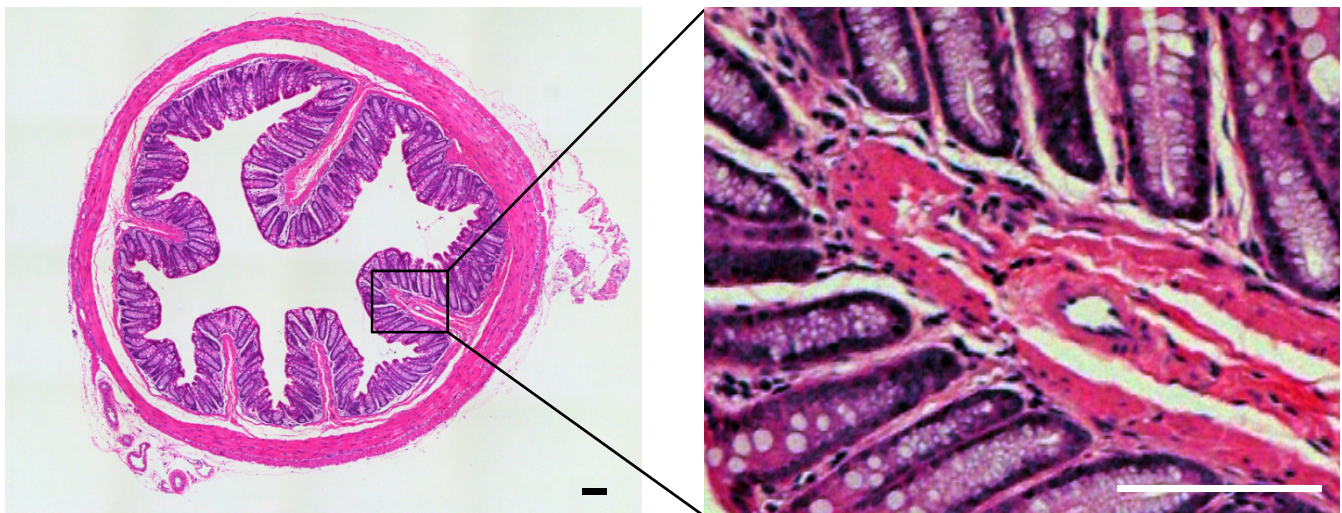

**Supplementary Figure S6.** Histological analysis by hematoxylin-eosin staining of the colon of the mouse after colorectal administration of Toc-siRNA with linoleic-acid mixed micelle. No pronounced local damage or histologic abnormality was observed. Bar = 100  $\mu$ m.

## SUPPLEMENTARY TABLES

**Supplementary Table S1. Mean diameter and size distribution of particles determined by DLS.**

| Composition                       | Mean diameter (nm) | The peak average (nm)        |                     |                     | Polydispersity index |
|-----------------------------------|--------------------|------------------------------|---------------------|---------------------|----------------------|
|                                   |                    | Scattered light distribution | Number distribution | Volume distribution |                      |
| Linoleic acid-HCO60 mixed micelle | 14.2 ± 0.2         | 17.1 ± 2.2                   | 8.7 ± 1.5           | 8.6 ± 1.6           | 0.133 ± 0.011        |
| Mixed micelle + Toc-siRNA         | 15.1 ± 0.1         | 15.6 ± 0.4                   | 9.1 ± 0.7           | 11.4 ± 0.4          | 0.103 ± 0.021        |
| Lymph                             | 267.8 ± 4.3        | 366.4 ± 8.3                  | 141.2 ± 18.1        | 185.7 ± 22.9        | 0.235 ± 0.008        |
| Lymph + Toc-siRNA                 | 238.5 ± 1.6        | 287.7 ± 17.1                 | 127.8 ± 4.8         | 167.9 ± 6.9         | 0.185 ± 0.014        |
| Chylomicron fraction (CM)         | 148.2 ± 2.0        | 172.7 ± 2.0                  | 88.7 ± 8.6          | 112.7 ± 7.8         | 0.133 ± 0.019        |
| CM + Toc-siRNA                    | 158.3 ± 1.2        | 179.9 ± 5.3                  | 100.6 ± 3.5         | 125.3 ± 6.7         | 0.133 ± 0.007        |

Mixed micelles comprised linoleic acid and HCO60 were filtered through a membrane filter (pore size, 0.45 µm). Lymph was collected via a thoracic duct fistula of the mice under the postprandial conditions, followed by ultracentrifugation to obtain the chylomicron fraction (CM). Toc-siRNA was incubated *in vitro* with MM, lymph, and CM at 37°C for 30 min. The particle size and size distribution were determined by DLS (Photal ELSZ-2). All samples in this table showed only one peak in the size distribution. The peak diameter and polydispersity index were calculated by a cumulant method. The data were presented as the means ± s.e.m. for independently triplicate determinations. Statistical analysis was performed by Student's *t*-test; \*  $p < 0.05$ ; \*\*  $p < 0.01$ ; NS, not significant.

**Supplementary Table S2. Concentration of Toc-siRNA in mouse liver and serum after rectal or intravenous administration of Toc-siRNA.**

| Organ | Administraion<br>route | Liver (pmol/g)  |      |
|-------|------------------------|-----------------|------|
|       |                        | Serum (nmol/l)  |      |
| Liver | Intrarectal            | 55.8 ± 2.6      | } ** |
|       | Intravenous            | 528.1 ± 138.0   |      |
| Serum | Intrarectal            | 8.20 ± 0.65     | } ** |
|       | Intravenous            | 647.08 ± 100.25 |      |

The data were presented as the means ± s.e.m. for independently triplicate determinations. Statistical analysis was performed by Student's *t*-test; \*\* *p* < 0.01.

### Supplementary Table S3. Sequences of Toc-siRNA.

| Toc-siRNA                                     | Strand    | Sequence                                 |
|-----------------------------------------------|-----------|------------------------------------------|
| Toc-siApoB                                    | Sense     | 5'-GuCAuCACACuGAAuACCAAUGCugG*A-3'       |
| (targeting mouse <i>ApoB</i> mRNA: NM_009693) | Antisense | 5'-ucc*A*gc*AUUGGuAuUCAGUGuGAuGAc*A*C-3' |
| Toc-siOAT3                                    | Sense     | 5'-CcAUuAUCUUGAAUgUGGAAUGGguA*c-3'       |
| (targeting mouse <i>Oat3</i> mRNA: NM_031194) | Antisense | 5'-gua*C*gc*AUUCCaCaJUCAAGaUAaUGg*U*G-3' |
| Toc-siScr                                     | Sense     | 5'-AcAUuUUACCuGGCaAGGAGUCAauC*C-3'       |
| (Scrambled sequence of Toc-siApoB)            | Antisense | 5'-gga*U*ug*ACUCCuUgCCAGGUaAUaUGu*A*C-3' |

Upper case letters represent RNA, lower case letters represent 2'-O-methyl sugar modification, and asterisks represent phosphorothioate linkages.

## SUPPLEMENTARY METHODS

**Particle sizing by dynamic light scattering (DLS).** Particle size distribution was evaluated by DLS (PhotalELSZ-2, Otsuka Electronics Co. Ltd., Osaka, Japan). Toc-siRNA was incubated *in vitro* with linoleic acid-HCO60 mixed micelles at 37°C for 30 min, and formation of complexes was confirmed by DLS.

**Concentration of Toc-siRNA in each organ.** In rectal administration, mice were administered with Cy3-conjugated Toc-siRNA, and 4 h later various organs (liver, kidney, spleen, jejunum, lung and brain) and serum were harvested. In intravenous injection, mice were injected from tail vein with Cy3-conjugated Toc-siRNA, and 1 h later liver and serum were harvested. The signal intensity of Cy3 in the samples was measured by i-control (Tecan, Männedorf, Switzerland), then the concentration of Toc-siRNA was calculated.
